# Supplementary material for: Kinetically asymmetric charge and discharge behavior of LiNi0.5Mn1.5O4 at low temperature observed by in situ X-ray diffraction
Source: Royal Society of Chemistry journal article supplement (doi:10.1039/c4ta01130a), 2014-01-01
Supplement: c4ta01130a1.pdf [file c4ta01130a1.pdf]

**Supplementary Information for**

**Kinetically asymmetric charge and discharge behavior of  $\text{LiNi}_{0.5}\text{Mn}_{1.5}\text{O}_4$  at low temperature observed by *in situ* X-ray diffraction**

Ikuma Takahashi, Haruno Murayama, Kenji Sato, Takahiro Naka, Koji Kitada,  
Katsutoshi Fukuda, Yukinori Koyama, Hajime Arai, Eiichiro Matsubara, Yoshiharu  
Uchimoto and Zempachi Ogumi

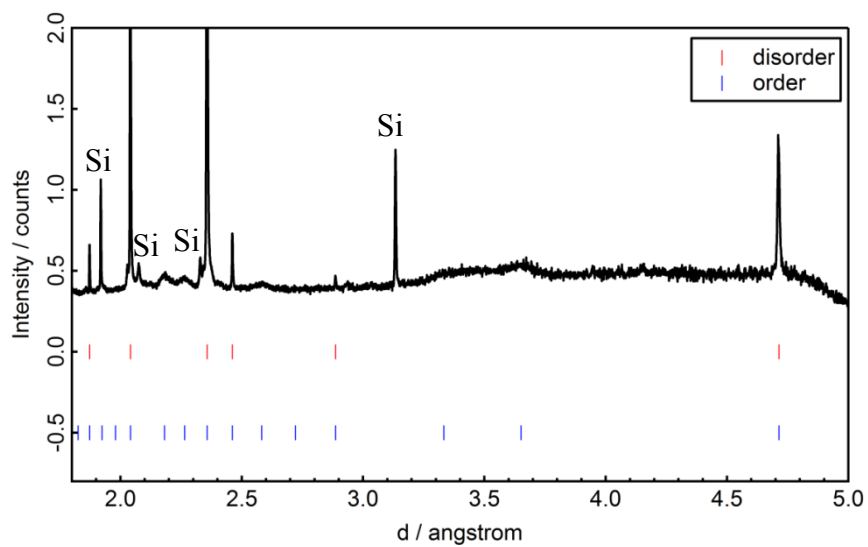

**Fig. S1** Neutron diffraction pattern of  $\text{LiNi}_{0.5}\text{Mn}_{1.5}\text{O}_4$  powder. The inset shows the magnified pattern. Si indicates the diffractions of silicon added to the sample as a standard.
